# Supplementary material for: Evaluation of the Genotoxicity of Almond Hull: Implications for Its Use as a Novel Food Ingredient
Source: MDPI journal article supplement (doi:10.3390/foods13091404), 2024-05-02
Supplement: s1 [file s1]

**Table S1.** Revertant colonies in the absence or presence of S9 mix in the second bacterial reverse mutation assay results.

|                             | Dose<br>( $\mu\text{g}/\text{plate}$ ) | TA97                 | TA98                 | TA100                | TA102               | TA1535              |
|-----------------------------|----------------------------------------|----------------------|----------------------|----------------------|---------------------|---------------------|
| Negative Control            |                                        |                      |                      |                      |                     |                     |
| Sterile distilled water -S9 | 0                                      | 122 $\pm$ 13         | 40 $\pm$ 4           | 152 $\pm$ 23         | 265 $\pm$ 10        | 17 $\pm$ 6          |
| Sterile distilled water +S9 | 0                                      | 125 $\pm$ 5          | 39 $\pm$ 4           | 138 $\pm$ 15         | 257 $\pm$ 14        | 19 $\pm$ 7          |
| Sterile distilled DMSO -S9  | 0                                      | 110 $\pm$ 9          | 37 $\pm$ 4           | 154 $\pm$ 18         | 256 $\pm$ 20        | 17 $\pm$ 4          |
| Sterile distilled DMSO +S9  | 0                                      | 118 $\pm$ 2          | 36 $\pm$ 6           | 150 $\pm$ 10         | 276 $\pm$ 14        | 19 $\pm$ 5          |
| Blank -S9                   | 0                                      | 109 $\pm$ 13         | 39 $\pm$ 4           | 163 $\pm$ 11         | 284 $\pm$ 29        | 21 $\pm$ 2          |
| Blank +S9                   | 0                                      | 122 $\pm$ 10         | 40 $\pm$ 4           | 149 $\pm$ 11         | 273 $\pm$ 19        | 20 $\pm$ 5          |
| AH -S9                      | 8                                      | 118 $\pm$ 8          | 39 $\pm$ 4           | 162 $\pm$ 11         | 292 $\pm$ 16        | 18 $\pm$ 7          |
|                             | 40                                     | 116 $\pm$ 11         | 31 $\pm$ 2           | 143 $\pm$ 29         | 268 $\pm$ 16        | 17 $\pm$ 5          |
|                             | 200                                    | 114 $\pm$ 15         | 39 $\pm$ 3           | 159 $\pm$ 17         | 279 $\pm$ 16        | 12 $\pm$ 3          |
|                             | 1000                                   | 115 $\pm$ 10         | 35 $\pm$ 4           | 156 $\pm$ 16         | 256 $\pm$ 12        | 22 $\pm$ 4          |
|                             | 5000                                   | 116 $\pm$ 14         | 40 $\pm$ 5           | 140 $\pm$ 30         | 301 $\pm$ 8         | 14 $\pm$ 1          |
| AH +S9                      | 8                                      | 121 $\pm$ 16         | 35 $\pm$ 5           | 145 $\pm$ 29         | 270 $\pm$ 14        | 17 $\pm$ 6          |
|                             | 40                                     | 128 $\pm$ 1          | 34 $\pm$ 3           | 157 $\pm$ 27         | 294 $\pm$ 13        | 12 $\pm$ 1          |
|                             | 200                                    | 125 $\pm$ 15         | 34 $\pm$ 1           | 152 $\pm$ 13         | 278 $\pm$ 24        | 15 $\pm$ 3          |
|                             | 1000                                   | 118 $\pm$ 4          | 37 $\pm$ 6           | 148 $\pm$ 24         | 265 $\pm$ 14        | 16 $\pm$ 7          |
|                             | 5000                                   | 109 $\pm$ 9          | 36 $\pm$ 7           | 153 $\pm$ 20         | 275 $\pm$ 30        | 17 $\pm$ 5          |
| Positive Control            |                                        |                      |                      |                      |                     |                     |
| Dexon                       | 50.0                                   | 1833 $\pm$ 81<br>*** | 833 $\pm$ 110<br>*** |                      | 753 $\pm$ 46<br>*** |                     |
| SA                          | 1.5                                    |                      |                      | 922 $\pm$ 89<br>***  |                     | 515 $\pm$ 60<br>*** |
| 2-AF                        | 10.0                                   | 1478 $\pm$ 70<br>*** | 2023 $\pm$ 99<br>*** | 967 $\pm$ 100<br>*** |                     |                     |
| DAN                         | 50.0                                   |                      |                      |                      | 850 $\pm$ 46<br>*** |                     |
| CP                          | 200.0                                  |                      |                      |                      |                     | 436 $\pm$ 51<br>*** |

Data are expressed as means  $\pm$  standard deviations ( $n = 3$ ). \*\*\* Significantly different from the sterile water control group,  $p < 0.001$ .

**Table S2.** Cytotoxicity of AHE against CHO cells.

| Dose ( $\mu\text{g}/\text{mL}$ ) | Cell Viability (%) |
|----------------------------------|--------------------|
| 0                                | 100.00 $\pm$ 0.00  |
| 1250                             | 88.73 $\pm$ 1.90   |
| 2500                             | 66.73 $\pm$ 3.57   |
| 5000                             | 46.67 $\pm$ 1.37   |

Data a expressed as means  $\pm$  standard deviations ( $n = 3$ ).

**Table S3.** Body weight of BALB/c mice before gavage and dissection for the spermatogonial chromosomal assay.

| Groups                | Dose (mg/kg·BW) | Sampling Point | Body Weight (g) |                   |
|-----------------------|-----------------|----------------|-----------------|-------------------|
|                       |                 |                | Before Gavage   | Before Dissection |
| Negative control      | 0               | 24             | 26.22 ± 0.67    | 26.32 ± 0.67      |
|                       |                 | 48             | 26.70 ± 0.57    | 26.93 ± 0.59      |
| Positive control (CP) | 80              | 24             | 26.32 ± 1.19    | 26.40 ± 1.18      |
|                       | 1250            | 24             | 26.02 ± 1.03    | 26.08 ± 1.09      |
| AH                    | 2500            | 48             | 26.07 ± 1.23    | 26.25 ± 1.30      |
|                       |                 | 24             | 26.13 ± 1.02    | 26.22 ± 1.09      |
|                       | 5000            | 48             | 26.03 ± 1.05    | 26.20 ± 1.08      |
|                       |                 | 24             | 26.13 ± 0.56    | 26.17 ± 0.57      |
|                       | 5000            | 48             | 26.30 ± 0.47    | 26.41 ± 0.45      |
|                       |                 | 24             | 26.13 ± 0.56    | 26.17 ± 0.57      |

Data are expressed as means ± standard deviations ( $n = 6$ ).

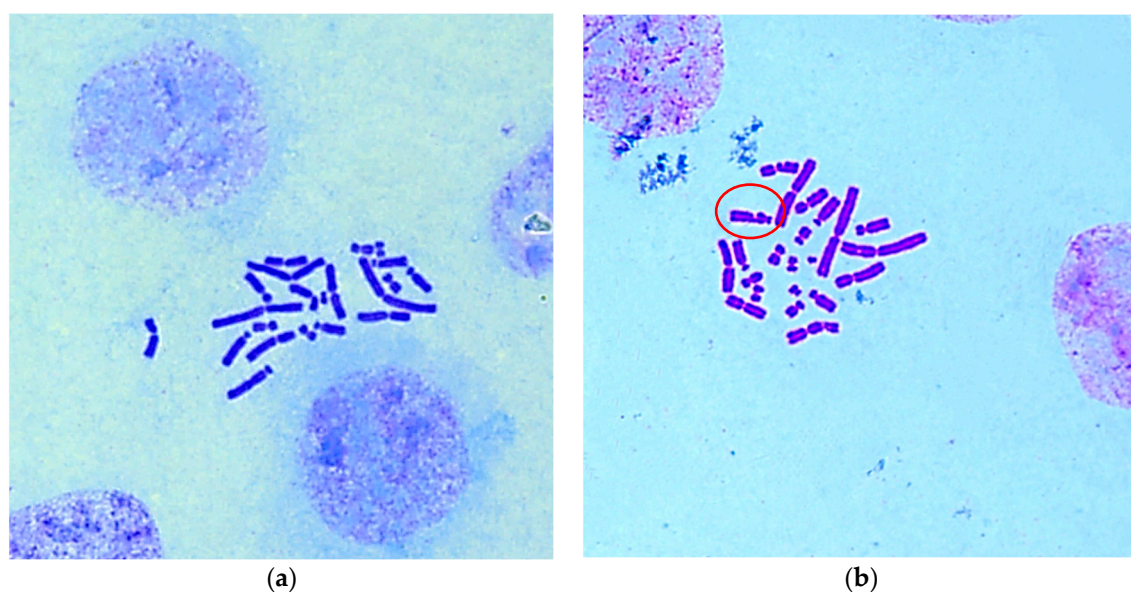

**Figure S1.** Representative photomicrographs of chromosomal aberrations in CHO cells under fluorescent microscope (magnification:  $\times 1000$ ): (a) normal metaphase of CHO cell; (b) CHO cell with chromatid break (as shown in red circle) treated with positive control (0.06  $\mu\text{g/mL}$  CP).
